# Supplementary material for: LRP5 Regulates HIF-1α Stability via Interaction with PHD2 in Ischemic Myocardium
Source: MDPI journal article supplement (doi:10.3390/ijms22126581), 2021-06-19
Supplement: s1 [file s1]

## Supplementary Data

Figure S1. Altered expression of LRP5 in cardiomyocytes under hypoxia

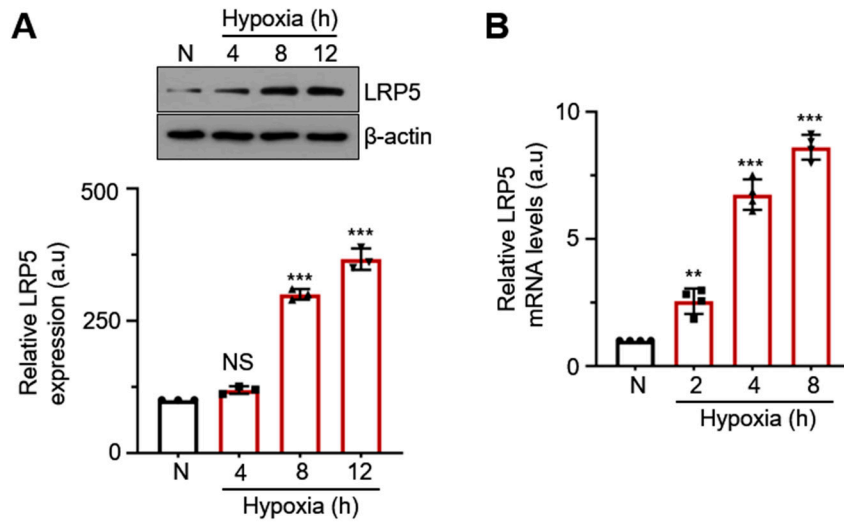

**Figure S1.** Cardiomyocytes were exposed to normoxia (indicated by “N”) or hypoxia (indicated by “H”) ( $O_2$  1.2%) at the indicated times. (A) The expression levels of LRP5 were analyzed on western blotting. Protein levels were normalized to  $\beta$ -actin levels.  $n=3$ /group. (B) The mRNA levels of LRP5 were quantified using qPCR. Gene expression was normalized to GAPDH.  $n=4$ /group. All graphs show means  $\pm$  SD. \*\* $P < 0.01$ , \*\*\* $P < 0.001$  versus Normoxia; NS, no significance.

**Figure S2. Construction of LRP5/6 and shLRP5/6 adenoviral vectors and their effects on the viability of hypoxic cardiomyocytes**

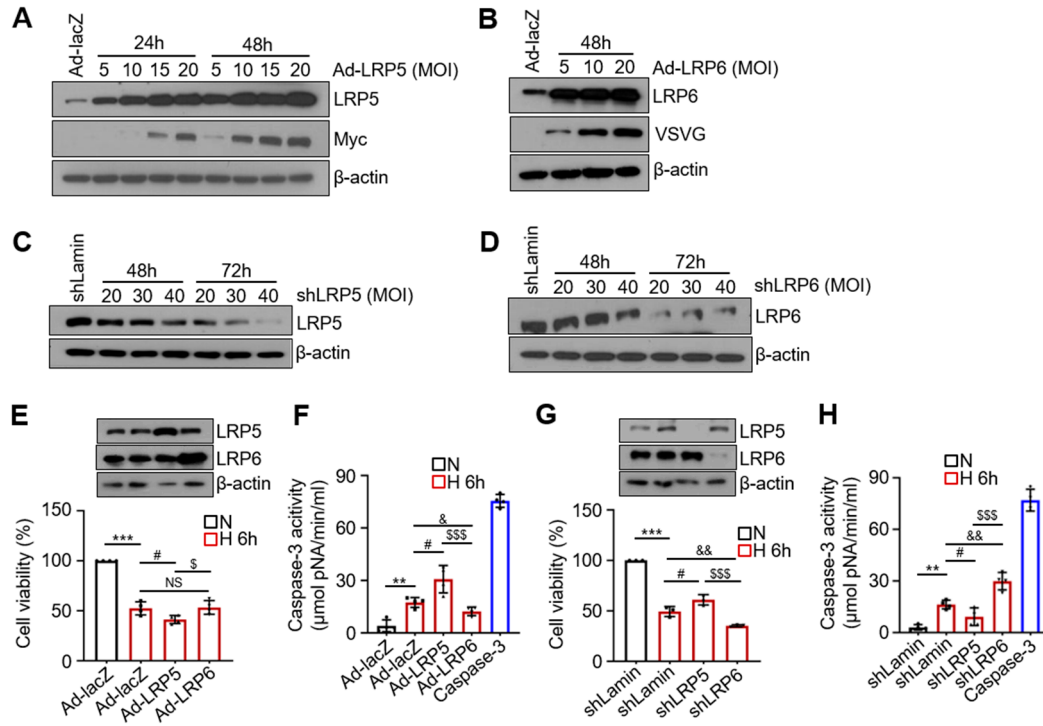

**Figure S2.** Cardiomyocytes were infected with adenoviruses expressing full-length LRP5/6 or shRNA targeting LRP5/6 at the indicated MOI values and times. Adenoviral transduction efficiency was assessed using western blotting. (A) Representative western blot images of cells infected with Ad-LRP5 (Myc tagging). (B) Representative western blot images of cells infected with Ad-LRP6 (VSVG tagging). (C) Representative western blot images of cells infected with shLRP5. (D) Representative western blot images of cells infected with shLRP6. Representative immunoblots from two independent experiments are presented. (E) Relative percent of cell viability was assessed using MTT assay in Ad-lacZ-, Ad-LRP5-, and Ad-LRP6-infected hypoxic cardiomyocytes. Normoxia is indicated as "N" and hypoxia is indicated as "H". Cell viability was normalized to normoxic Ad-lacZ control. n=4/group. Means  $\pm$  SD. \*\*\* $P$  < 0.001 versus Normoxia; # $P$  < 0.05 Ad-LRP5 versus Ad-lacZ; \$ $P$  < 0.05 Ad-LRP6 versus Ad-LRP5; NS, no significance. (F) Measurement of caspase-3 activity for Ad-lacZ-, Ad-LRP5-, and Ad-LRP6-infected hypoxic cardiomyocytes. Data are presented in  $\mu$ mol of pNA (p-Nitroaniline) per minute per volume of sample in ml. Caspase-3 was used as a positive control; 5  $\mu$ l of 5  $\mu$ g/ml. n=4/group. Means  $\pm$  SD. \*\* $P$  < 0.01 versus Normoxia; # $P$  < 0.05 Ad-LRP5 versus Ad-lacZ; \$\$\$ $P$  < 0.001 Ad-LRP6 versus Ad-LRP5; & $P$  < 0.05 Ad-LRP6 versus Ad-lacZ. (G) Relative percent of cell viability assessed using MTT assay in shLamin-, shLRP5-, and shLRP6-infected hypoxic cardiomyocytes. Cell viability was normalized to normoxic shLamin control. G; n=4; H; n=3. Means  $\pm$  SD. \*\* $P$  < 0.01 versus Normoxia; # $P$  < 0.05 shLRP5 versus shLamin; \$\$\$ $P$  < 0.001 shLRP6 versus shLRP5; & $P$  < 0.05 shLRP6 versus shLamin. (H) Measurement of caspase-3 activity for shLamin-, shLRP5-, and shLRP6-infected hypoxic cardiomyocytes. n=4/group. Means  $\pm$  SD. \*\* $P$  < 0.01 versus Normoxia; # $P$  < 0.05 shLRP5 versus shLamin; \$\$\$ $P$  < 0.001 shLRP6 versus shLRP5; && $P$  < 0.01 shLRP6 versus shLamin.

**Figure S3. LRP5 does not regulate HIF-1 $\alpha$  expression at the transcriptional level but inhibits nuclear translocation of HIF-1 $\alpha$**

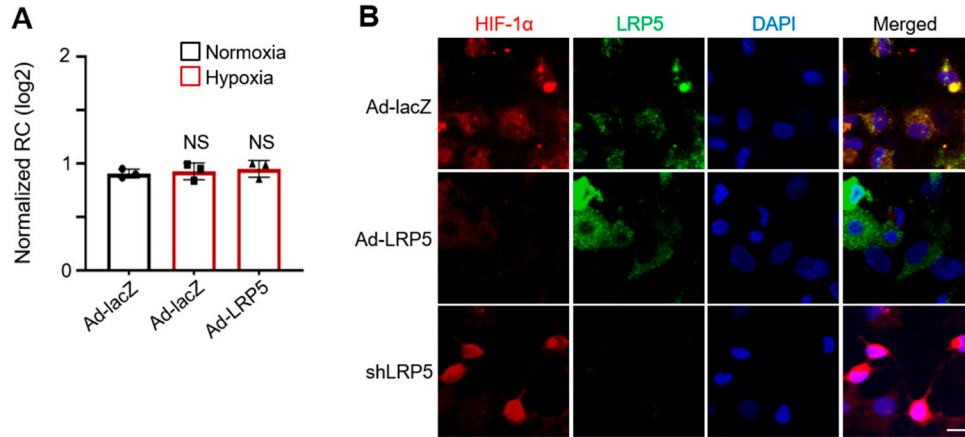

**Figure S3.** (A) Extracted total RNA from triplicated biological samples were subjected to mRNA sequencing. Each Fold change in hypoxic Ad-lacZ and Ad-LRP5-infected cardiomyocytes was calculated relative to normoxic Ad-lacZ control. n=3/group. Graph shows means  $\pm$  SD. NS, no significance. (B) Ad-lacZ-, Ad-LRP5-, and shLRP5-infected cardiomyocytes were co-stained with HIF-1 $\alpha$  (red) and LRP5 (green) after exposure to hypoxic condition (90 min). Nuclei were stained with DAPI (blue). The image shows translocation of HIF-1 $\alpha$  into the nucleus. Immunofluorescence was observed using confocal microscopy. Scale bar, 50  $\mu$ m.

**Figure S4. Altered expression of Wnt3a in LRP5-silenced cardiomyocytes and effects of hypoxia on  $\beta$ -catenin expression**

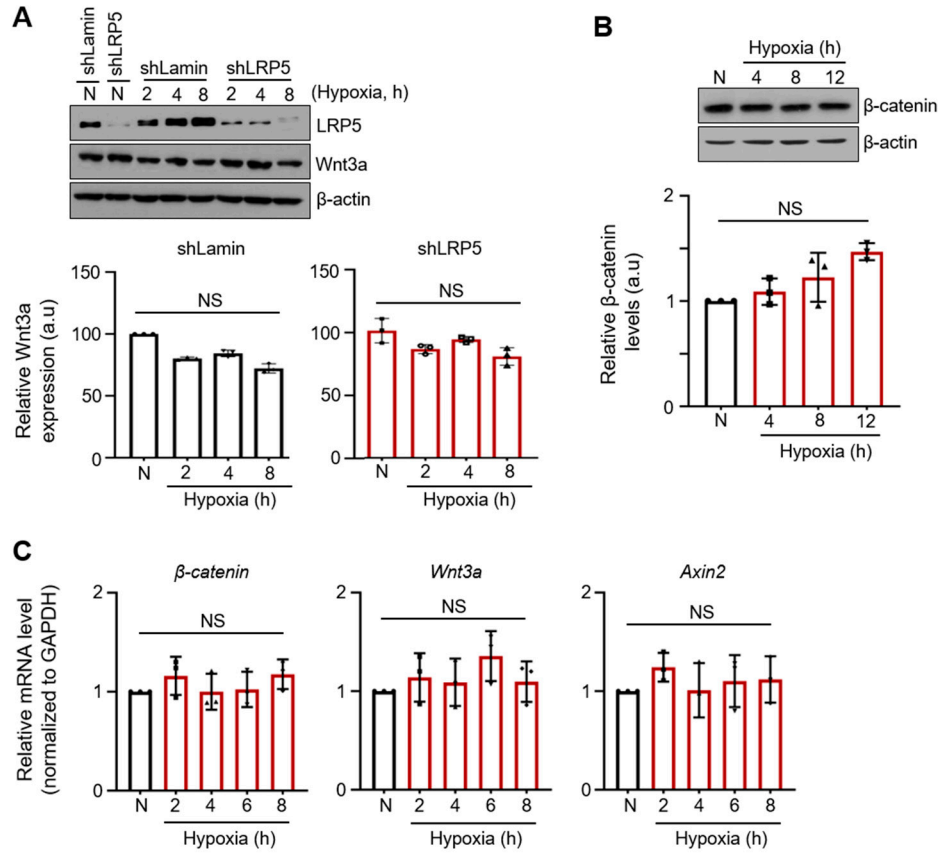

**Figure S4. (A)** Cardiomyocytes were exposed to normoxia or hypoxia ( $O_2$  3%) at the indicated times. Then protein expression levels were analyzed on western blotting and their levels were normalized to  $\beta$ -actin levels. Protein levels were normalized to  $\beta$ -actin levels.  $n=3$ /group. All graphs show means  $\pm$  SD. NS, no significance. **(B and C)** Cardiomyocytes were exposed to hypoxia and harvested at the indicated time points for **(B)** western blotting and **(C)** real-time qPCR. Protein and gene expression was normalized to  $\beta$ -actin and GAPDH, respectively.  $n=3$ /group. All graphs show means  $\pm$  SD. NS, no significance.

**Figure S5. *In vivo* myocardial gene delivery using adenoviruses**

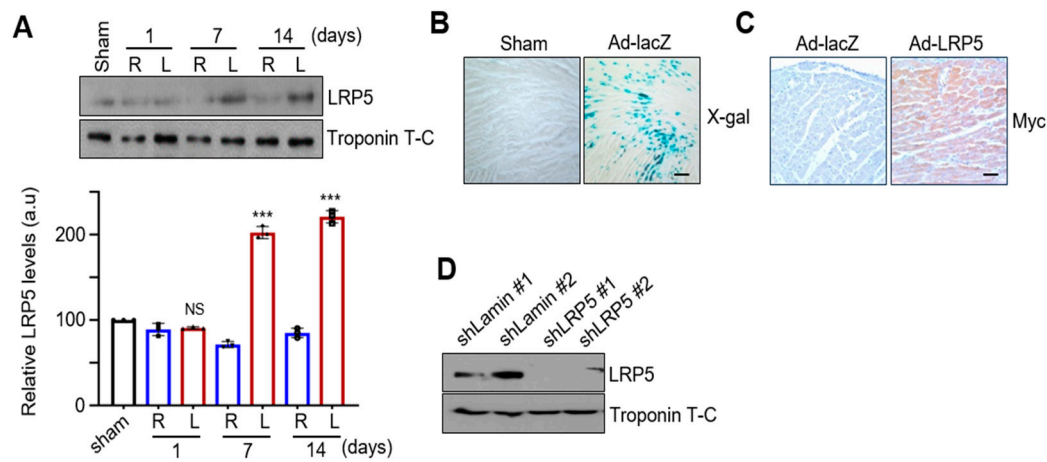

**Figure S5.** (A) Representative western blot analysis showing expression of LRP5 from right and left ventricle in I/R-injured heart lysates. Troponin T-C was used as the loading control. n=3/group. Graph shows means  $\pm$  SD. \*\*\* $P < 0.001$  versus right ventricle; NS, no significance. (B) Representative sections from Sham or lacZ-infected heart tissues stained with X-gal (blue) to assess  $\beta$ -galactosidase activity. n=3/group. Scale bar, 100  $\mu$ m. (C) Representative images of immunohistochemical staining from lacZ or LRP5-infected heart tissues using Myc antibody. n=3/group. Scale bar, 100  $\mu$ m. (D) Representative western blot analysis showing expression of LRP5 in shLamin- or shLRP5-injected heart lysates. Troponin T-C was used as the loading control.

**Table S1. Functional enrichment analysis of common genes by GO-terms.**

**A. Ad-lacZ**

| Term                                                                 | Category | Number of genes | %   | p-value | Genes                                                                                                                                                                                                                                                                                                                                          |
|----------------------------------------------------------------------|----------|-----------------|-----|---------|------------------------------------------------------------------------------------------------------------------------------------------------------------------------------------------------------------------------------------------------------------------------------------------------------------------------------------------------|
| Cellular response to hypoxia                                         | B.P.     | 25              | 2.3 | 1.8E-9  | Bnip3, Bnip3l, Bbc3, Fas, Higd1a, Mdm2, Ndr1, Ppargc1a, Rora, Cox4i2, Ero1a, Fam162a, Foxo3, Hmox1, IL7, Mif, Mgarp, Kcnk3, Slc2a4, Slc8a3, Stc1, Stc2, Tbl2, Vegfa, Vldlr                                                                                                                                                                     |
| Response to hypoxia                                                  | B.P.     | 35              | 3.3 | 6.9E-9  | Abcb1b, Bnip3, Cxcr4, Cx3cl1, Cbfa2t3, Cd24, Ddit4, Fosl2, Fas, Ppargc1a, Xrcc1, Aldh3a1, Aldoc, Alkbh5, Ang, Angpt2, Angptl4, Apold1, Cdkn1b, Cyp1a1, Egln1, Egln3, Ednra, Hp, Hmox1, Il1a, Il1b, Kdm3a, Nos2, Nfatc3, Ppara, Pkm, Tgfb3, Vegfa, Vldlr                                                                                        |
| Glycolytic process                                                   | B.P.     | 10              | 0.9 | 2.3E-5  | Aldoc, Eno2, LOC100911625, Gpi, Hk2, Pfk1, Pkm, Tpi1, LOC500959, LOC100911515                                                                                                                                                                                                                                                                  |
| Negative regulation of apoptotic process                             | B.P.     | 37              | 3.5 | 1.5E-3  | Alms1, Ahi1, Bcl6, Bnip3, Bnip3l, Fas, Gli2, Higd1a, Mdm2, Mgmt, Pim1, Wt1, Amigo2, Angptl4, Alox15, Birc3, Cdkn1a, Cdkn1b, Dapk1, Ednra, Eef2k, Eif2ak2, Gnrh1, Gfer, Ifit3, Il6, Il7, Kdm2a, Ltk, Mif, Slc2a3, LOC100909595, Slc25a27, Slc40a1, Sycp2, Sycp3, Vegfa                                                                          |
| Positive regulation of apoptotic process                             | B.P.     | 26              | 2.4 | 3.5E-3  | Bcl6, Bcl2l11, Bnip3, Bnip3l, Bbc3, Bmf, Ddit3, Fas, Wt1, Aldh1a3, Dhodh, Egln1, Eif2ak2, Fam162a, Foxo3, Hmox1, Il1b, Il6, Jmy, Map3k1, Nos2, Nfatc4, Osgin1, Scin, Tfp4, Tp53inp1                                                                                                                                                            |
| Oxidation-reduction process                                          | B.P.     | 43              | 4.0 | 2.8E-3  | Foxred2, Hhip1, Higd1a, Ndufa4l2, Aldh1a3, Aldh1l1, Aldh3a1, Aox1, Aox2, Akr1c19, Bco1, Cbr1, Cbr3, LOC102556347, Cyp1a1, Cyp2r1, Cyp27a1, Cyp39a1, Cyp4f37, Cyp4f39, Cyp4f5, Cyp7b1, Cyb5r2, Dhrr3, Dhdh, Dhodh, Egln1, Egln3, Ero1a, Gsto2, Gfer, Hsd17b13, Kdm3a, Kdm5b, Maob, Nos2, Osgin1, P4ha2, Spr, LOC497963, RGD1560795, Smox, Srxn1 |
| Negative regulation of transcription from RNA polymerase II promoter | B.P.     | 47              | 4.4 | 4.3E-3  | Bcl6, Cbfa2t3, Crebrf, Ddit3, Gzfl, Gli2, Glis1, Glis3, Mxi1, Mnt, Mdm2, Phf21a, Rcor2, LOC102552640, Sox6, Sap30, Wt1, Atn1, Bhlhe40, Cbx2, Cbx7, Cdkn1c, Cpeb3, Ezh1, Efna1, Fgf9, Fnip1, Foxo3, Hist1h1c, Hdac9, Il1b, Lcor, Lpin1, Mxd1, Nfatc4, Ncoa2, Nr1d1, Ppara, Sik1, Sqstm1, Stat1, Sorbs3, Tshz2, Vegfa, Vldlr, LOC102550291, Zhx2 |
| Apoptotic process                                                    | B.P.     | 23              | 2.1 | 5.0E-2  | Bnip3, Bbc3, Ddit3, Ddit4, Fas, Pim1, Tnfrsf9, Wt1, XAF1, Aldoc, Birc3, Dapk1, Egln3, Foxo3, Gas2, Gja1, Irf1, Mapt, Niacr1, Rnf152, Sqstm1, Tp53inp1, Usp53                                                                                                                                                                                   |
| Glucose homeostasis                                                  | B.P.     | 12              | 1.1 | 1.3E-2  | Alms1, Csmd1, Adgrf5, Foxo3, Gpi, Insr, Il6, Pde3b, Pygl, Ppp1r3g, Pdk4, Slc2a4                                                                                                                                                                                                                                                                |

## B. Ad-LRP5

| Term                                                                 | Category | Number of genes | %   | p-value | Genes                                                                                                                                                                                                                                                                                                                                          |
|----------------------------------------------------------------------|----------|-----------------|-----|---------|------------------------------------------------------------------------------------------------------------------------------------------------------------------------------------------------------------------------------------------------------------------------------------------------------------------------------------------------|
| Cellular response to hypoxia                                         | B.P.     | 20              | 2.3 | 7.9E-8  | Bnip3, Bnip3l, Bbc3, Fas, Higd1a, Mdm2, Ndrp1, Rora, Cox4i2, Ero1a, Fam162a, Foxo3, Hmox1, IL7, Mif, Mgarp, Slc8a3, Stc2, Tbl2, Vegfa                                                                                                                                                                                                          |
| Response to hypoxia                                                  | B.P.     | 28              | 3.3 | 1.8E-7  | Abcb1b, Bnip3, Cxcr4, Cx3cl1, Cbfa2t3, Cd24, Ddit4, Fosl2, Fas, Aldh3a1, Aldoc, Alkbh5, Angpt2, Angptl4, Apold1, Cdkn1b, Cyp1a1, Egln1, Egln3, Ednra, Hp, Hmox1, Il1a, Il1b, Kdm3a, Nos2, Tgfb3, Vegfa                                                                                                                                         |
| Glycolytic process                                                   | B.P.     | 6               | 0.7 | 7.8E-3  | Aldoc, Eno2, LOC100911625, Gpi, Hk2, Pfk1, Pkm, Tpi1, LOC500959, LOC100911515                                                                                                                                                                                                                                                                  |
| Negative regulation of apoptotic process                             | B.P.     | 32              | 3.7 | 6.5E-4  | Ahi1, Bcl6, Bnip3, Bnip3l, Fas, Gli2, Higd1a, Mdm2, Mgmt, Pim1, Wt1, Amigo2, Angptl4, Alox15, Birc3, Cdkn1b, Dapk1, Ednra, Eif2ak2, Gnrh1, Ifit3, Il6, Il7, Ltk, Mif, Pde3a, Slc2a3, LOC100909595, Slc25a27, Sycp2, Sycp3, Vegfa                                                                                                               |
| Positive regulation of apoptotic process                             | B.P.     | 27              | 3.1 | 3.7E-5  | Bcl6, Bcl2l11, Bnip3, Bnip3l, Bbc3, Bmf, Ddit3, Fas, Wt1, Aldh1a3, Dhodh, Egln1, Eif2ak2, Fam162a, Foxo3, Hmox1, Il1b, Il6, Jmy, Map3k1, Ntrk3, Ntf3, Nos2, Nfatc4, Scin, Tfp4, Tp53inp1                                                                                                                                                       |
| Oxidation-reduction process                                          | B.P.     | 36              | 4.2 | 2.0E-3  | Foxred2, Hhip1, Higd1a, Ndufa4l2, Aldh1a3, Aldh1l1, Aldh3a1, Aox1, Aox2, Akr1c19, Bco1, Cbr1, Cbr3, LOC102556347, Cyp1a1, Cyp2r1, Cyp27a1, Cyp39a1, Cyp4f37, Cyp4f39, Cyp4f5, Cyp7b1, Cyb5r2, Dhfr3, Dhdh, Dhodh, Egln1, Egln3, Ero1a, Gsto2, Gfer, Hsd17b13, Kdm3a, Kdm5b, Maob, Nos2, Osgin1, P4ha2, Spr, LOC497963, RGD1560795, Smox, Srxn1 |
| Negative regulation of transcription from RNA polymerase II promoter | B.P.     | 37              | 4.3 | 9.6E-3  | Bcl6, Cbfa2t3, Crebrf, Ddit3, Gli2, Glis1, Glis3, Mxi1, Mnt, Mdm2, Phf21a, Rcor2, LOC102552640, Wt1, Atn1, Bhlhe40, Cbx2, Cbx7, Ezh1, Efnal, Fgf9, Fnip1, Foxo3, Il1b, Lcor, Lpin1, Mxd1, Nfatc4, Ncoa2, Sik1, Sqstm1, Stat1, Sorbs3, Tshz2, Vegfa, LOC102550291, Zhx2                                                                         |
| Apoptotic process                                                    | B.P.     | 20              | 2.3 | 2.7E-2  | Bnip3, Bbc3, Ddit3, Ddit4, Fas, Pim1, Tnfrsf9, Wt1, XAF1, Aldoc, Birc3, Dapk1, Egln3, Foxo3, Gas2, Irf1, Niacr1, Rnf152, Sqstm1, Tp53inp1                                                                                                                                                                                                      |
| Glucose homeostasis                                                  | B.P.     | 9               | 1.0 | 4.4E-2  | Adgrf5, Foxo3, Gpi, Insr, Il6, Pde3b, Pygl, Ppp1r3g, Pdk4                                                                                                                                                                                                                                                                                      |

### C. shLRP5

| Term                                                                 | Category | Number of genes | %   | p-value | Genes                                                                                                                                                                                                                                                                                                                                                                                      |
|----------------------------------------------------------------------|----------|-----------------|-----|---------|--------------------------------------------------------------------------------------------------------------------------------------------------------------------------------------------------------------------------------------------------------------------------------------------------------------------------------------------------------------------------------------------|
| Response to hypoxia                                                  | B.P.     | 40              | 3.5 | 7.0E-11 | Abcb1b, Bnip3, Cxcr4, Cx3cl1, Cbfa2t3, Cd24, Ddit4, Fosl2, Fas, Ppargc1a, Xrcc1, Aldh3a1, Aldoc, Alkbh5, Ang, Angpt2, Angptl4, Apold1, Car9, Cdkn1b, Cyp1a1, Egln1, Egln3, Ednra, Hp, Hmox1, Kdm3a, Nos1, Nos2, Nfatc3, Ppara, Plod1, Penk, P2rx3, Pkm, Sod3, Trh, Tgfb3, Vegfa, Vldlr                                                                                                     |
| Cellular response to hypoxia                                         | B.P.     | 26              | 2.3 | 1.5E-9  | Atp7a, Bnip3, Bnip3l, Bbc3, Fas, Higd1a, Mdm2, Ndr1, Ppargc1a, Rora, S100b, Cox4i2, Ero1a, Fam162a, Foxo3, Hmox1, Mif, LOC103694877, Mgarp, Slc2a4, Slc8a3, Stc1, Stc2, Tbl2, Vegfa, Vldlr                                                                                                                                                                                                 |
| Oxidation-reduction process                                          | B.P.     | 52              | 4.6 | 5.8E-5  | Foxred2, Hhip1, Higd1a, Ndufa4l2, Aldh1a3, Aldh1l1, Aldh3a1, Aox1, Aox2, Akr1c19, Bcl6, Cbr1, Cbr3, LOC102556347, Cyp1a1, Cyp2r1, Cyp27a1, Cyp39a1, Cyp4f37, Cyp4f39, Cyp4f5, Cyp7b1, Cyb5r2, Dhfr3, Dhfr, Dhodh, Egln1, Egln3, Ero1a, Gsto2, Gfer, Hsd17b13, Kdm3a, Kdm5b, Maob, Nos2, Osgin1, P4ha2, Spr, LOC497963, RGD1560795, Smox, Srxn1                                             |
| Glycolytic process                                                   | B.P.     | 10              | 0.9 | 4.0E-5  | Aldoc, Eno2, LOC100911625, Gpi, Hk2, Pfkfb3, Pkm, Tpi1, LOC500959, LOC100911515                                                                                                                                                                                                                                                                                                            |
| Negative regulation of transcription from RNA polymerase II promoter | B.P.     | 54              | 4.8 | 4.8E-4  | Bcl6, Cbfa2t3, Creb1, Ddit3, Gatad2b, Gzfl, Gli2, Glis1, Glis3, Mxi1, Mnt, Mdm2, Phf21a, Rcor2, LOC102552640, Sox18, Sox6, Wt1, Atf1, Acvrb2, Atf1, Bhlhe40, Cbx2, Cbx7, Cdkn1c, Ednrb, Ezh1, Efn1, Fgf9, Fgf1, Foxo3, Foxp2, Hes3, LOC100912068, Hic1, Jarid2, Lcor, Lpin1, Mxd1, Msc, Mzf1, Notch1, Nfatc4, Nr0b2, Nr1d1, Ppara, Kcnip3, Rara, Sik1, Sqstm1, Sorbs3, Tshz2, Vegfa, Vldlr |
| Positive regulation of apoptotic process                             | B.P.     | 31              | 2.7 | 2.5E-4  | Bcl6, Bcl2l1, Bnip3, Bnip3l, Bbc3, Bmf, Ddit3, Fas, S100b, Steap3, Wt1, C6, Cyp1b1, Dhodh, Egln1, Fam162a, Foxo1, Foxo3, Hmox1, Jmy, Map3k1, Map3k9, Nos2, Notch1, Nfatc4, Osgin1, Scin, Tfp4, Tp53inp1, Uaca, Zfp819                                                                                                                                                                      |
| Glucose homeostasis                                                  | B.P.     | 15              | 1.3 | 1.1E-3  | Csmd1, Adgrf5, Ankrd26, Foxo1, Foxo3, Gcgr, Gpi, Insr, Igfbp5, Pde3b, Pygl, Ppp1r3g, Pdk4, Slc2a4, Slc37a4                                                                                                                                                                                                                                                                                 |
| Negative regulation of apoptotic process                             | B.P.     | 34              | 3.0 | 2.3E-2  | Ahi1, Bcl6, Bnip3, Bnip3l, Ercc5, Fas, Gli2, Higd1a, Mdm2, Wt1, Amigo2, Angptl4, Alox15, Birc3, Cdkn1b, Dapk1, Dpep1, Ednra, Ednrb, Eef2k, Foxo1, Gnrh1, Ltk, Kdm2a, Mif, Nos1, Pde3a, Pik3r1, Rara, Slc2a3, LOC100909595, Slc40a1, Syce3, Vegfa                                                                                                                                           |
| Apoptotic process                                                    | B.P.     | 24              | 2.1 | 2.9E-2  | Bnip3, Bbc3, Ddit3, Ddit4, Fas, Madd, Steap3, Tnfrsf9, Wt1, Aldoc, Birc3, Chik1, Dapk1, Dpep1, Duxbl1, Egln3, Foxo1, Foxo3, Gja1, Kcnip3, Rtn, Rnf153, Sqstm1, Tp53inp1                                                                                                                                                                                                                    |

GO, gene ontology; BP, biological process.



**Table S2. KEGG enrichment analysis of common genes in hypoxic cardiomyocytes.**

**A. Ad-lacZ**

| Term                                   | Number of genes | %   | p-value | Genes                                                                                                                                                                                                                                                                                                                                                                                                                                                                                                                             |
|----------------------------------------|-----------------|-----|---------|-----------------------------------------------------------------------------------------------------------------------------------------------------------------------------------------------------------------------------------------------------------------------------------------------------------------------------------------------------------------------------------------------------------------------------------------------------------------------------------------------------------------------------------|
| Metabolic pathways                     | 69              | 6.4 | 8.0E-3  | Gbe1, Hmgcs2, Nt5c2, Gch1, Nadk2, Ndufa4l2, Rev3l, Ugp2, Ak4, Aldh1a3, Aldh3a1, Aox1, Aox2, Aldoc, Acer2, Aadat, Alox15, Bco1, Cbr1, Cbr3, LOC102556347, Cers6, Cmpk2, Cyp1a1, Cyp2r1, Cyp27a1, Cox4i2, Dhrr3, Dgki, Dhodh, Eno2, LOC100911625, Gpi, Glis2, Gfpt2, Gpat3, Hpse, Hk2, Ipmk, Kyat1, Kyat3, Lpin1, Mboat2, Maob, Mtmr14, Mtmr7, Nampt, Nos2, Olah, Pik3c2b, Pik3c2g, Phospho1, Pfk1, Pla2g2a, Pla2g4b, Pla2g6, Pla2g4f, Pla2g12a, Pygl, P4ha2, Ptges, Pdxp, Pkm, Spr, LOC497963, Tpi1, LOC500959, LOC100911515, Upp1 |
| HIF-1 signaling pathway                | 40              | 3.6 | 2.5E-6  | Pfkfb3, Angpt2, Cdkn1a, Cdkn1b, Egln1, Egln3, Eno2, LOC100911625, Hmox1, Hk2, Insr, Nos2, Pdk1, LOC497963, Slc2a1, Vegfa, Bnip3, Ndufa4l2, Cmpk2, Ndrgr1, Ak4, Ddit4, Ero1a, Ccng2, Maob, Angptl4, Cox4i2, Cbfa2t3, Olah, Higd1a, Fam162a, Foxo3, pdk1, Nampt, HP, Ang, Ppara, Tpi1, kyat1, Slc2a4                                                                                                                                                                                                                                |
| PI3K-Akt signaling pathway             | 25              | 2.3 | 4.7E-3  | Bcl2l11, Ddit4, Gng4, Mdm2, Angpt2, Col6a5, Col6a6, Col11a2, Col24a1, Csf3, Cdkn1a, Cdkn1b, Efna1, Fgf11, Fgf9, Foxo3, Gys1, Insr, Il2ra, Il6, Il7, Lama5, Pdgfra, Reln, Vegfa                                                                                                                                                                                                                                                                                                                                                    |
| Cytokine-cytokine receptor interaction | 21              | 2.0 | 1.3E-4  | Ccl5, Cxcl10, Cxcl11, Cxcl13, Cxcl2, Cxcr4, Cx3cl1, Fas, Tnfrsf14, Tnfrsf1b, Tnfrsf9, Ackr3, Csf3, Eda2r, Il1a, Il1b, Il15ra, Il2ra, Il6, Il7, Lif                                                                                                                                                                                                                                                                                                                                                                                |
| FoxO signaling pathway                 | 14              | 1.3 | 3.1E-3  | Bcl6, Bcl2l11, Bnip3, Fbxo32, Gabarapl1, Mdm2, Ccng2, Cdkn1a, Cdkn1b, Foxo3, Insr, Il6, Prkab2, Slc2a4                                                                                                                                                                                                                                                                                                                                                                                                                            |
| TNF signaling pathway                  | 15              | 1.4 | 1.1E-4  | Ccl5, Cxcl1, Cxcl10, Cxcl2, Cx3cl1, Fas, Nfkb1a, Tnfai3, Tnfrsf1b, Traf1, Birc3, Cxcl3, Il1b, Il6, Lif                                                                                                                                                                                                                                                                                                                                                                                                                            |

## B. Ad-LRP5

| Term                         | Number of genes | %   | p-value | Genes                                                                                                                                                                                                                                                                                                                                                                                                      |
|------------------------------|-----------------|-----|---------|------------------------------------------------------------------------------------------------------------------------------------------------------------------------------------------------------------------------------------------------------------------------------------------------------------------------------------------------------------------------------------------------------------|
| Metabolic pathways           | 54              | 6.3 | 2.7E-2  | Gbe1, Gch1, Nadk2, Ndufa4l2, Ak4, Aldh1a3, Aldh3a1, Aox1, Aox2, Aldoc, Acer2, Aadat, Alox15, Bco1, Cbr1, LOC102556347, Cers6, Cmpk2, Cyp1a1, Cyp27a1, Cox4i2, Dhrr3, Dgki, Dhodh, Eno2, LOC100911625, Gpi, Gfpt2, Gfpt3, Hpse, Hk2, H6pd, Ipmk, Kyat1, Lpin1, Mboat2, Maob, Mtmr14, Mtmr7, Nampt, Nos2, Olah, Pik3c2b, Pik3c2g, Pfk1, Pla2g2a, Pla2g4f, Pla2g12a, Pygl, P4ha2, Ptges, Pdxp, Spr, LOC497963 |
| HIF-1 signaling pathway      | 35              | 4.1 | 7.2E-7  | Pfkfb3, Angpt2, Cdkn1b, Egln1, Egln3, Eno2, LOC100911625, Hmox1, Hk2, Insr, Nos2, Pdk1, LOC497963, Slc2a1, Vegfa, Bnip3, Ndufa4l2, Cmpk2, Ndr1, Ak4, Ddit4, Ero1a, Ccng2, Maob, Angptl4, Cox4i2, Cbfa2t3, Olah, Higd1a, Fam162a, Foxo3, pdk1, Nampt, HP                                                                                                                                                    |
| PI3K-Akt signaling pathway   | 22              | 2.9 | 4.1E-2  | Bcl2l11, Ddit4, Gng4, Mdm2, Angpt2, Col6a5, Col6a6, Col11a2, Csf3, Cdkn1b, Efna1, Fgf11, Fgf9, Foxo3, Gys1, Insr, Il2ra, Il6, Il7, Pdgfra, Reln, Vegfa                                                                                                                                                                                                                                                     |
| FoxO signaling pathway       | 11              | 1.3 | 1.2E-2  | Bcl6, Bcl2l11, Bnip3, Fbxo32, Gabarapl1, Mdm2, Ccng2, Cdkn1b, Foxo3, Insr, Il6                                                                                                                                                                                                                                                                                                                             |
| TNF signaling pathway        | 14              | 1.6 | 4.1E-5  | Ccl5, Cxcl10, Cxcl2, Cx3cl1, Fas, Nfkb1a, Tnfaip3, Tnfrsf1b, Traf1, Birc3, Cxcl3, IL1b, Il6, Lif                                                                                                                                                                                                                                                                                                           |
| Glycolysis / Gluconeogenesis | 8               | 0.9 | 6.8E-3  | Aldh1a3, Aldh3a1, Aldoc, Eno2, LOC100911625, Gpi, Hk2, Pfk1                                                                                                                                                                                                                                                                                                                                                |

### C. shLRP5

| Term                         | Number of genes | %   | p-value | Genes                                                                                                                                                                                                                                                                                                                                                                                                                                                                                                                                                                            |
|------------------------------|-----------------|-----|---------|----------------------------------------------------------------------------------------------------------------------------------------------------------------------------------------------------------------------------------------------------------------------------------------------------------------------------------------------------------------------------------------------------------------------------------------------------------------------------------------------------------------------------------------------------------------------------------|
| Metabolic pathways           | 77              | 6.9 | 3.2E-4  | Gbe1, Papss3, Hmgcs2, Bdh1, Nt5m, Atp6v0a4, Nadk2, Ndufa4l2, Nme3, Ugp2, Acss3, Ak4, Aldh3a1, Aox1, Aox2, Aldoc, Acer2, Aadat, Alox15, Arg1, Bco1, Cbr1, LOC102556347, Cers6, Cdo1, Cyp1a1, Cyp2r1, Cox4i2, Dhrr3, Dck, Dhodh, Eno2, LOC100911625, Gpi, Gls2, Gfpt2, Gatb, Gpat3, Hpse, Hk2, H6pd, Hykk, Hsd11b1, Itpk1, Kyat1, Lpin1, Mboat2, Maob, Mtnr14, Nampt, Nos1, Nos2, Olah, Ogdhl, Pcyt1b, Piga, Pik3c2b, Phospho1, Pfk1, Pla2g2a, Pla2g4b, Pla2g6, Pla2g4f, Pla2g12a, Ppcdc, Pygl, P4ha2, Ptgs, Ptges, Pdxp, Pkm, Spr, LOC497963, Tpi1, LOC500959, LOC100911515, Xylb |
| HIF-1 signaling pathway      | 36              | 3.3 | 7.2E-7  | Pfkfb3, Mknk2, Angpt2, Cdkn1b, Egln1, Egln3, Eno2, LOC100911625, Hmox1, Hk2, Insr, Nos2, Pik3r1, Pdk1, LOC497963, Slc2a1, Vegfa, Bnip3, Ndufa4l2, Cmpk2, Ndr1, Ak4, Ddit4, Ero1a, Ccng2, Maob, Angptl4, Cox4i2, Cbfa2t3, Olah, Higd1a, Fam162a, Foxo3, pdk1, Nampt, HP                                                                                                                                                                                                                                                                                                           |
| PI3K-Akt signaling pathway   | 24              | 2.1 | 1.3E-2  | Bcl2l11, Ddit4, Gng4, Mdm2, Angpt2, Col6a5, Col6a6, Col11a2, Col24a1, Csf3, Cdkn1b, Efna1, Fgf11, Fgf9, Foxo3, Gys1, Insr, Itgb8, Il2ra, Lama5, Pik3r1, Pdgfra, Reln, Vegfa                                                                                                                                                                                                                                                                                                                                                                                                      |
| FoxO signaling pathway       | 15              | 1.3 | 1.5E-3  | Bcl6, Bcl2l11, Bnip3, Fbxo32, Gabarapl1, Mdm2, Ccng2, Cdkn1b, Foxo1, Foxo3, Irs3, Insr, Pik3r1, Prkab2, Slc2a4                                                                                                                                                                                                                                                                                                                                                                                                                                                                   |
| TNF signaling pathway        | 10              | 0.9 | 3.6E-2  | Ccl5, Cxcl2, Cx3cl1, Fas, Tab1, Tnfaip3, Traf1, Birc3, Lif, Pik3r1                                                                                                                                                                                                                                                                                                                                                                                                                                                                                                               |
| Glycolysis / Gluconeogenesis | 11              | 1.0 | 5.6E-4  | Aldh1a3, Aldoc, Eno2, LOC100911625, Gpi, Hk2, Pfk1, Pkm, Tpi1, LOC500959, LOC100911515                                                                                                                                                                                                                                                                                                                                                                                                                                                                                           |
